# Supplementary material for: Verifying the olefin formation mechanism of the methanol-to-hydrocarbons reaction over H-ZSM-48
Source: Royal Society of Chemistry journal article supplement (doi:10.1039/c8cy02621a), 2019-01-01
Supplement: c8cy02621a1.pdf [file c8cy02621a1.pdf]

## Supporting information for

### ‘Verifying the olefin formation mechanism of the methanol-to-hydrocarbons reaction over H-ZSM-48’

Jie Zhang<sup>a,b</sup>, Zhihua Huang<sup>a,b</sup>, Lanjian Xu<sup>a,b</sup>, Xiaomin Zhang<sup>a</sup>, Xinzhi Zhang<sup>a</sup>,  
Yangyang Yuan<sup>a,\*</sup>, and Lei Xu<sup>a,\*</sup>

<sup>a</sup> Dalian National Laboratory for Clean Energy, Dalian Institute of Chemical Physics, Chinese Academy of Sciences, Dalian 116023, P. R. China;

<sup>b</sup> University of Chinese Academy of Sciences, Beijing 100049, P. R. China.

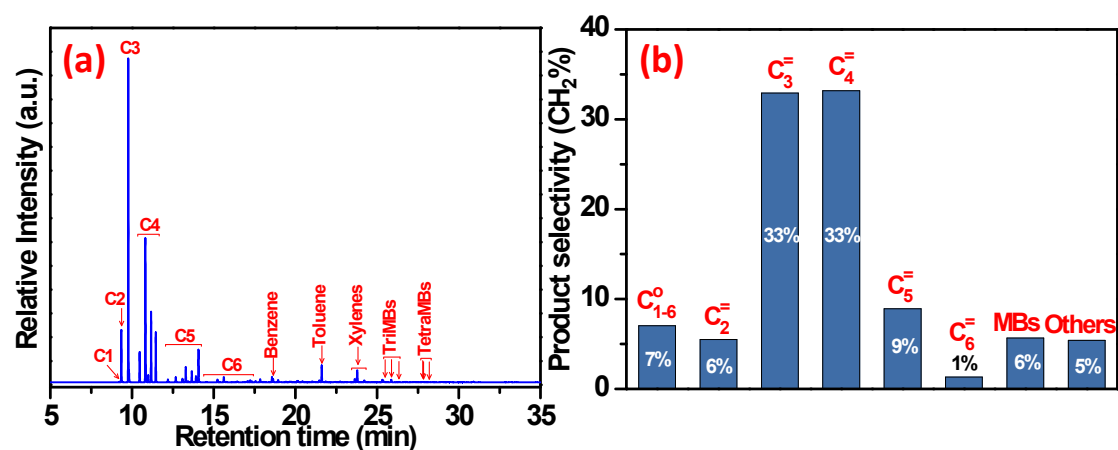

Fig. S1 GC chromatogram (a) and Product selectivity (b) of the reaction of pure tert-Butanol on zeolite H-ZSM-48. Reaction conditions: 450 °C, catalyst weight of 60 mg, tert-Butanol WHSV of 0.4 h<sup>-1</sup>, TOS of 10 min.

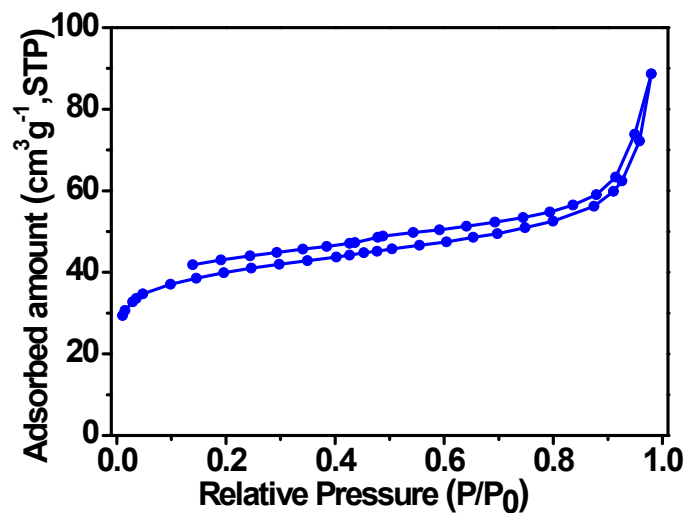

Fig. S2 N<sub>2</sub> adsorption-desorption isotherm of H-ZSM-48

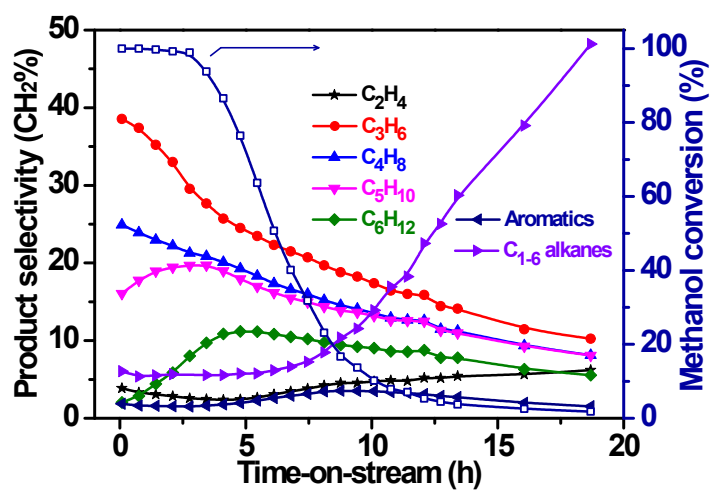

Fig. S3 Methanol conversion and product selectivity over H-ZSM-48. Reaction conditions: 17 kPa MeOH, catalyst weight of 100 mg, WHSV of 2 h<sup>-1</sup> and 723 K.

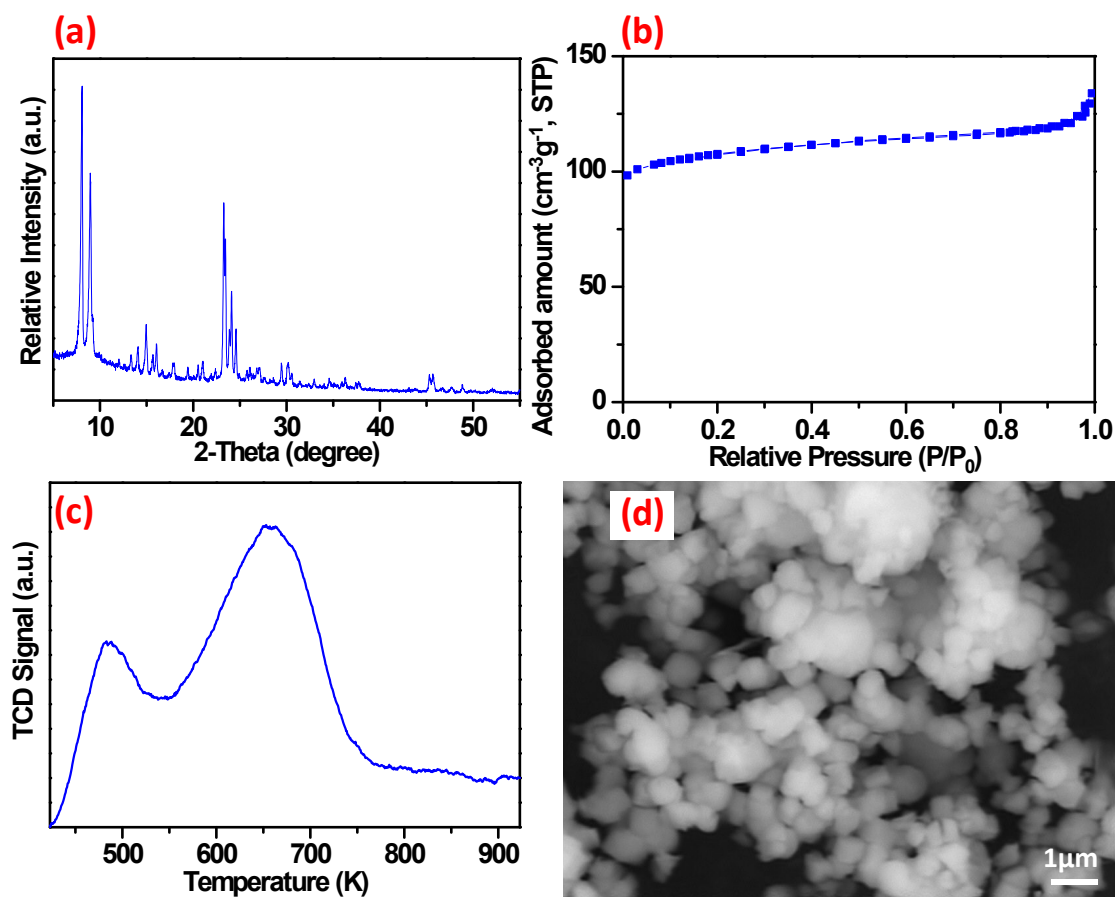

Fig. S4 XRD pattern (a), N<sub>2</sub> adsorption-desorption isotherm (b), NH<sub>3</sub>-TPD profile (c), and SEM image of H-ZSM-5.

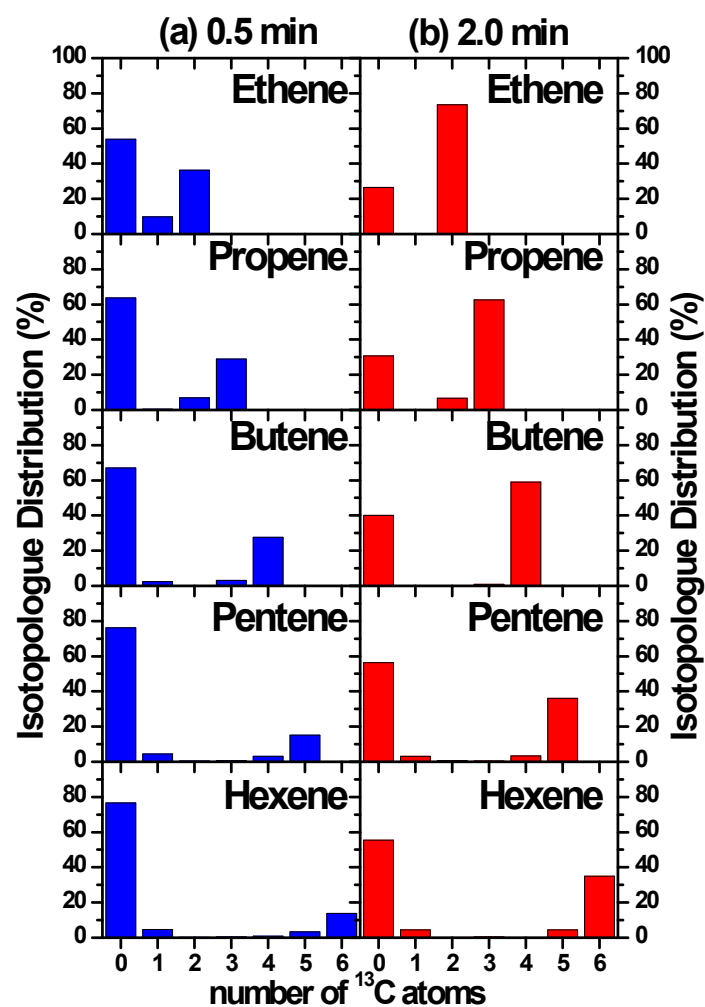

Fig. S5 Isotopic labelling patterns for effluent products formed after the <sup>12</sup>C/<sup>13</sup>C switch experiment over H-Z-SM-48 at 723K with <sup>12</sup>C-methanol feeding for 18 min followed by 0.5 and 2 min of <sup>13</sup>C-methanol feeding and a WHSV of 25 h<sup>-1</sup>.

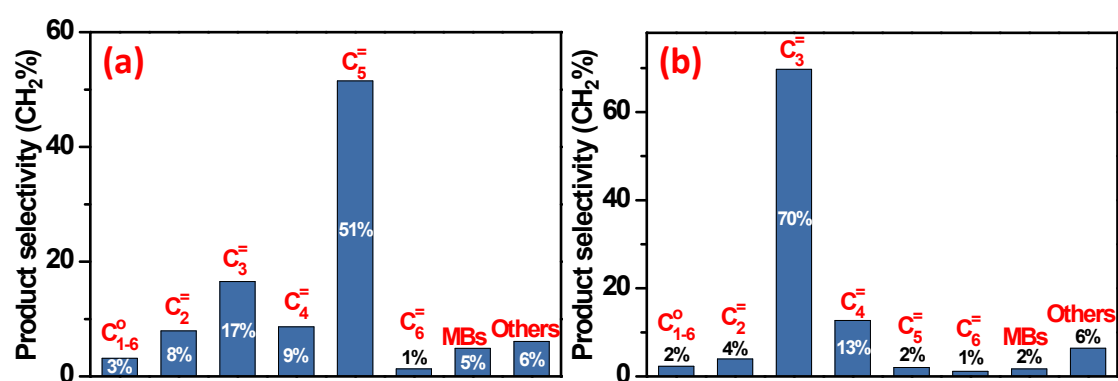

Fig. S6 Product selectivity of pentene (a) and hexene (b) alone reacted over H-ZSM-48 zeolite after 10 min on stream. Reaction conditions: 723 K, The feeding rate was equivalent to 3 C% of methanol (WHSV = 2.0 h<sup>-1</sup>, Section 3.2), 1-Pentanol and 1-Hexanol were used as the precursor of pentene and hexene, respectively.

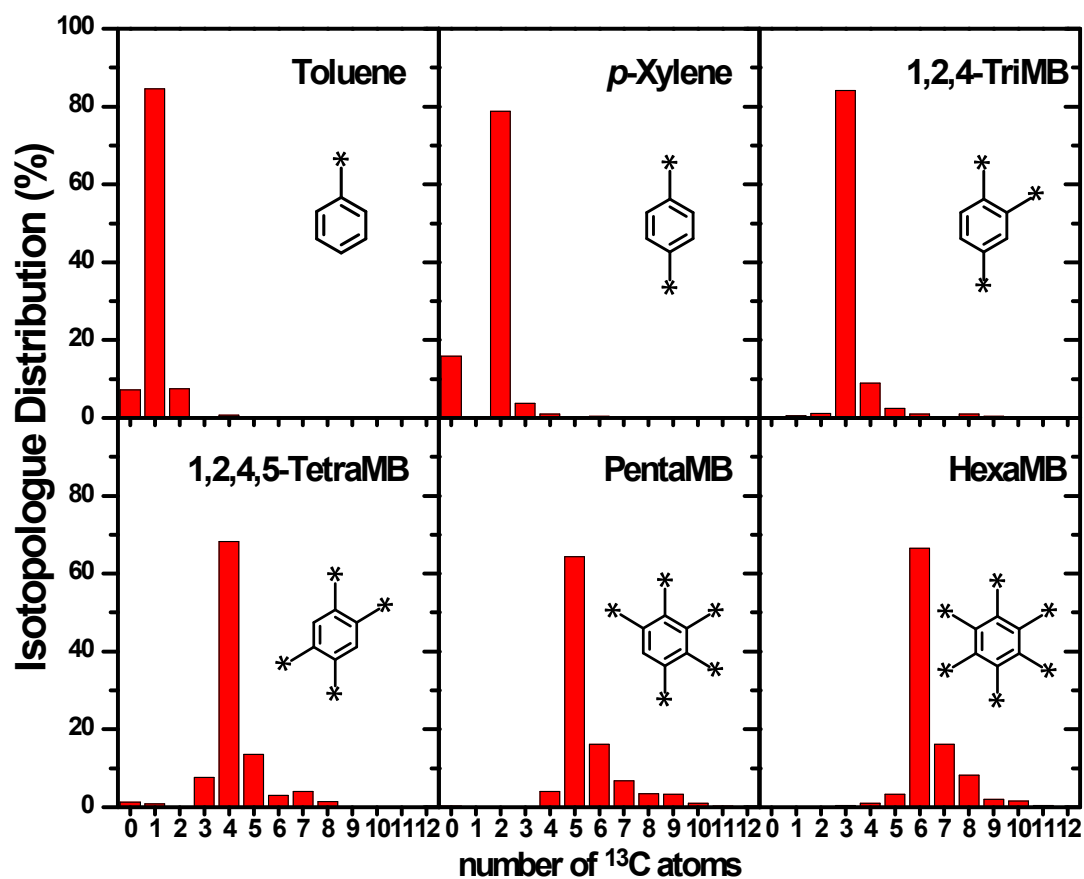

Fig. S7 Isotopic labelling patterns for methylbenzenes formed after 2 minutes of co-reacting  $^{13}\text{C}$  methanol with  $^{12}\text{C}$  benzene (molar ratio 3:1) at 543 K over H-ZSM-48.

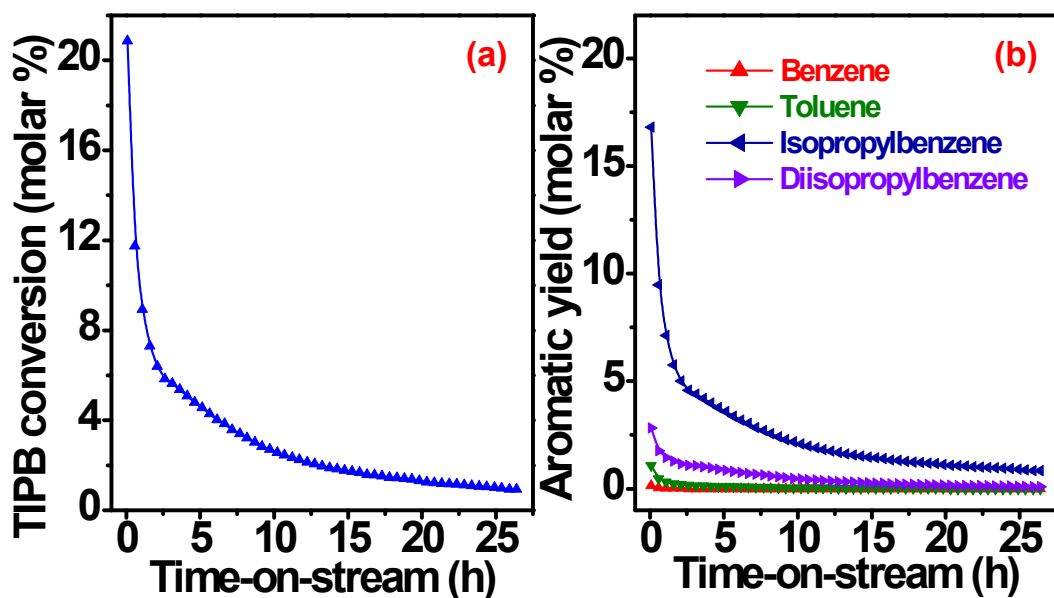

Fig. S8 TIPB conversion (a) and product distributions (b) over H-ZSM-48. Reaction conditions: 573 K, catalyst weight of 60 mg, vaporized TIPB in nitrogen ( $80 \text{ mL min}^{-1}$ , 358 K) as feed.

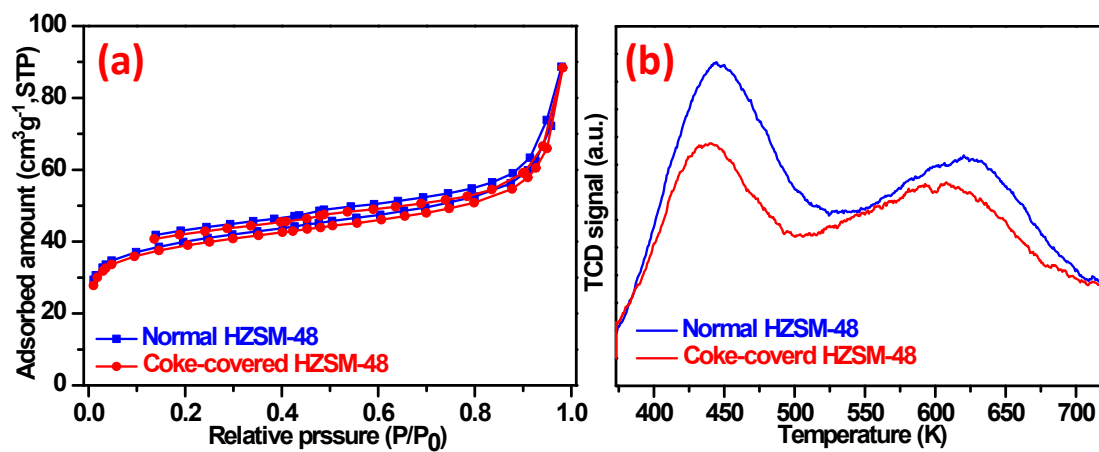

Fig. S9 Nitrogen adsorption-desorption isotherms (a) and NH<sub>3</sub>-TPD profiles over Normal H-ZSM-48 and coke-covered H-ZSM-48.

**Table S1** Methanol conversion and product selectivity over H-ZSM-48 at different reaction temperature.<sup>a</sup>

| Temperature/K                        | 723   | 823   | 873   | 973   |
|--------------------------------------|-------|-------|-------|-------|
| MeOH Conversion/%                    | 99.95 | 99.96 | 99.95 | 99.97 |
| C <sub>3-6</sub> <sup>=</sup>        | 80.7  | 59.8  | 51.6  | 16.0  |
| C <sub>1-6</sub> alkanes             | 6.0   | 6.9   | 11.5  | 23.1  |
| MBs                                  | 1.8   | 10.5  | 13.7  | 18.8  |
| Product selectivity/wt% <sup>b</sup> |       |       |       |       |
| H <sub>2</sub>                       | 0.00  | 0.00  | 0.01  | 0.00  |
| CO                                   | 0.67  | 1.01  | 3.12  | 26.81 |
| CO <sub>2</sub>                      | 0.31  | 0.30  | 0.89  | 1.53  |
| CH <sub>4</sub>                      | 0.71  | 2.97  | 8.97  | 21.96 |
| C <sub>2-6</sub> alkanes             | 5.27  | 3.95  | 2.52  | 1.14  |
| C <sub>2</sub> H <sub>4</sub>        | 3.84  | 19.85 | 16.40 | 11.51 |
| C <sub>3</sub> H <sub>6</sub>        | 38.19 | 42.70 | 34.77 | 10.91 |
| C <sub>4</sub> <sup>=</sup>          | 24.66 | 15.54 | 14.23 | 3.63  |
| C <sub>5</sub> <sup>=</sup>          | 15.90 | 0.91  | 0.89  | 0.17  |
| C <sub>6</sub> <sup>=</sup>          | 2.02  | 0.65  | 1.68  | 1.32  |
| Benzene                              | 0.07  | 1.44  | 1.90  | 5.90  |
| Toluene                              | 0.41  | 4.22  | 5.20  | 6.85  |
| Xylene                               | 0.98  | 3.97  | 5.17  | 4.67  |
| TriMB                                | 0.32  | 0.77  | 1.20  | 1.14  |
| TetraMB                              | 0.07  | 0.10  | 0.27  | 0.23  |
| Others <sup>c</sup>                  | 6.59  | 1.62  | 2.81  | 2.23  |

<sup>a</sup> Reaction conditions: 17 kPa MeOH, catalyst weight of 100 mg, WHSV of 2 h<sup>-1</sup> and TOS of 5 min.

<sup>b</sup> The product selectivity was analysed by a gas chromatograph (Agilent 7890A, equipped with a capillary CP-Sil PONA column and a Porapak Q packed column) with a FID detector and a TCD detector. The yields of hydrocarbon were determined with CP-Sil PONA column and FID. And, the yields of CO, CO<sub>2</sub>, CH<sub>4</sub>, and H<sub>2</sub> were determined with Porapak Q (1/8 in. × 4 m) column and TCD. He was used as carrier gas. This Agilent 7890A was configured with a ten-way valve. <sup>c</sup> Other fraction includes C<sub>7+</sub> hydrocarbons except methylbenzenes.

**Table S2** Textural and acidic properties of H-ZSM-5.

| Si/Al | Surface area (m <sup>2</sup> g <sup>-1</sup> ) |                                 |                                    | Pore volume (cm <sup>3</sup> g <sup>-1</sup> ) |                                | T <sub>peak</sub> (°C) |                      | Acid amount <sup>e</sup> (μmol g <sup>-1</sup> ) |              |                |
|-------|------------------------------------------------|---------------------------------|------------------------------------|------------------------------------------------|--------------------------------|------------------------|----------------------|--------------------------------------------------|--------------|----------------|
|       | S <sub>BET</sub> <sup>a</sup>                  | S <sub>micro</sub> <sup>b</sup> | S <sub>external</sub> <sup>b</sup> | V <sub>micro</sub> <sup>b</sup>                | V <sub>meso</sub> <sup>c</sup> | LT peak <sup>d</sup>   | HT peak <sup>d</sup> | Total acidity                                    | Weak acidity | Strong acidity |
| 93.3  | 346                                            | 278                             | 68                                 | 0.136                                          | 0.062                          | 175.7                  | 374.4                | 241.0                                            | 122.4        | 118.6          |

<sup>a</sup> Surface area by Brunauer-Emmett-Teller (BET) method. <sup>b</sup> Micropore and external surface area and micropore volume by t-plot method. <sup>c</sup> Mesopore volume by Barrett-Joyner-Hallenda (BJH) method. <sup>d</sup> The LT peak represents a low temperature desorption peak. The HT peak represents a high temperature desorption peak. <sup>e</sup> Calculated with Gaussian function fit.

**Table S3** Methanol conversion and product selectivity over H-ZSM-5 at different reaction temperature.<sup>a</sup>

| Temperature/K                                                | 723  | 823  | 873  | 973   |
|--------------------------------------------------------------|------|------|------|-------|
| Conversion/%                                                 | 100  | 100  | 100  | 100   |
| C <sub>3</sub> H <sub>6</sub> /C <sub>2</sub> H <sub>4</sub> | 4.3  | 2.4  | 1.8  | 0.7   |
| C <sub>4</sub> HTI                                           | 0.13 | 0.06 | 0.04 | 0.04  |
| C <sub>5</sub> HTI                                           | 0.27 | 0.34 | 0.29 | 0.41  |
| C <sub>6</sub> HTI                                           | 0.61 | 0.42 | 0.16 | 0.02  |
| Ethene/2MBu                                                  | 3.2  | 25.5 | 79.2 | 331.9 |
| C <sub>3-6</sub> <sup>=</sup>                                | 69.5 | 63.0 | 50.3 | 14.7  |
| C <sub>1-6</sub> alkanes                                     | 10.3 | 7.1  | 9.8  | 32.8  |
| Aromatics                                                    | 5.4  | 9.3  | 16.8 | 31.2  |
| Product selectivity/CH <sub>2</sub> %                        |      |      |      |       |
| CH <sub>4</sub>                                              | 0.6  | 3.2  | 7.4  | 31.6  |
| C <sub>2-6</sub> alkanes                                     | 9.7  | 3.9  | 2.4  | 1.2   |
| C <sub>2</sub> H <sub>4</sub>                                | 9.4  | 19.2 | 21.8 | 17.8  |
| C <sub>3</sub> H <sub>6</sub>                                | 39.9 | 45.5 | 38.2 | 12.6  |
| C <sub>4</sub> <sup>=</sup>                                  | 22.9 | 15.7 | 10.9 | 1.6   |
| C <sub>5</sub> <sup>=</sup>                                  | 5.4  | 1.2  | 0.6  | 0.1   |
| C <sub>6</sub> <sup>=</sup>                                  | 1.3  | 0.7  | 0.6  | 0.4   |
| Benzene                                                      | 0.3  | 0.9  | 2.0  | 7.1   |
| Toluene                                                      | 1.5  | 3.2  | 6.0  | 11.4  |
| Xylene                                                       | 2.8  | 4.0  | 6.9  | 9.4   |
| TriMB                                                        | 0.8  | 1.0  | 1.8  | 3.1   |
| TetraMB                                                      | 0.1  | 0.1  | 0.1  | 0.3   |
| Others <sup>b</sup>                                          | 5.4  | 1.5  | 1.2  | 3.4   |

<sup>a</sup> Reaction conditions: 17 kPa MeOH, catalyst weight of 100 mg, WHSV of 2 h<sup>-1</sup> and TOS of 5 min.

<sup>b</sup> Other fraction includes C<sub>7+</sub> hydrocarbons except methylbenzenes.



**Table S4** Methanol conversion and product selectivity after 18 min of the  $^{12}\text{C}$ -methanol reaction followed by 2 min of  $^{13}\text{C}$ -methanol reaction over H-ZSM-48 at 723 K and 44.5 kPa MeOH.

| Catalyst                                                     | H-ZSM-48 |
|--------------------------------------------------------------|----------|
| WHSV/h <sup>-1</sup>                                         | 25       |
| Methanol conversion/%                                        | 62.8     |
| C <sub>3</sub> H <sub>6</sub> /C <sub>2</sub> H <sub>4</sub> | 11.3     |
| C <sub>4</sub> HTI                                           | 0.01     |
| C <sub>5</sub> HTI                                           | 0.06     |
| C <sub>6</sub> HTI                                           | 0.21     |
| Ethene/2MBu                                                  | 0.41     |
| Product selectivity/CH <sub>2</sub> %                        |          |
| C <sub>1-6</sub> alkanes                                     | 6.5      |
| C <sub>2</sub> H <sub>4</sub>                                | 2.1      |
| C <sub>3</sub> H <sub>6</sub>                                | 23.4     |
| C <sub>4</sub> <sup>=</sup>                                  | 19.1     |
| C <sub>5</sub> <sup>=</sup>                                  | 18.8     |
| C <sub>6</sub> <sup>=</sup>                                  | 11.8     |
| Others <sup>a</sup>                                          | 17.1     |
| Methylbenzenes                                               | 1.4      |

<sup>a</sup> Other fraction includes C<sub>7+</sub> hydrocarbons except methylbenzenes (MBs).

**Table S5** Conversion and product selectivity after 2 minutes of co-reacting  $^{13}\text{C}$  methanol with  $^{12}\text{C}$  benzene (molar ratio 3:1) at 543 K over H-ZSM-48.

|                                             |        |
|---------------------------------------------|--------|
| Reaction temperature                        | 543 K  |
| Combined conversion of MeOH and Benzene(C%) | 1.82   |
| C <sub>1-6</sub> aliphatic products (C%)    | 5.37   |
| <hr/>                                       |        |
| Product selectivity (C%)                    |        |
| CH <sub>4</sub>                             | 0.22   |
| C <sub>2</sub> H <sub>4</sub>               | 0.98   |
| C <sub>2</sub> H <sub>6</sub>               | 0.03   |
| C <sub>3</sub> H <sub>6</sub>               | 1.42   |
| C <sub>3</sub> H <sub>8</sub>               | 0.03   |
| C <sub>4</sub> <sup>=</sup>                 | 0.52   |
| C <sub>4</sub> <sup>o</sup>                 | 0.35   |
| C <sub>5</sub> <sup>=</sup>                 | 0.34   |
| C <sub>5</sub> <sup>o</sup>                 | 0.79   |
| C <sub>6</sub> <sup>=</sup>                 | 0.00   |
| C <sub>6</sub> <sup>o</sup>                 | 0.68   |
| Other <sup>a</sup>                          | 7.32   |
| Toluene                                     | 83.75  |
| Xylenes                                     | 3.36   |
| TriMBs                                      | 0.20   |
| TetraMBs                                    | 0.00   |
| Total                                       | 100.00 |

<sup>a</sup> Other fraction includes C<sub>7+</sub> hydrocarbons except MBs.
